## **Title Page**

**Title:** FR-Match: Robust matching of cell type clusters from single cell RNA sequencing data using the Friedman-Rafsky non-parametric test

**Authors:** Yun Zhang<sup>1</sup>, Brian D. Aeversmann<sup>1</sup>, Trygve E. Bakken<sup>2</sup>, Jeremy A. Miller<sup>2</sup>, Rebecca D. Hodge<sup>2</sup>, Ed S. Lein<sup>2</sup>, Richard H. Scheuermann<sup>1,3,4</sup>

**Affiliations:** <sup>1</sup>J. Craig Venter Institute, La Jolla, CA, USA; <sup>2</sup>Allen Institute for Brain Science, Seattle, WA, USA; <sup>3</sup>Department of Pathology, University of California San Diego, La Jolla, CA, USA; <sup>4</sup>Division of Vaccine Discovery, La Jolla Institute for Immunology, La Jolla, CA, USA

**Corresponding Author:** Richard H. Scheuermann, 858-200-1876, [rscheuermann@jcvl.org](mailto:rscheuermann@jcvl.org)

## Abstract

Single cell/nucleus RNA sequencing (scRNAseq) is emerging as an essential tool to unravel the phenotypic heterogeneity of cells in complex biological systems. While computational methods for scRNAseq cell type clustering have advanced, the ability to integrate datasets to identify common and novel cell types across experiments remains a challenge. Here, we introduce a cluster-to-cluster cell type matching method – FR-Match – that utilizes supervised feature selection for dimensionality reduction and incorporates shared information among cells to determine whether two cell type clusters share the same underlying multivariate gene expression distribution. FR-Match is benchmarked with existing cell-to-cell and cell-to-cluster cell type matching methods using both simulated and real scRNAseq data. FR-Match proved to be a stringent method that produced fewer erroneous matches of distinct cell subtypes and had the unique ability to identify novel cell phenotypes in new datasets. *In silico* validation demonstrated that the proposed workflow is the only self-contained algorithm that was robust to increasing numbers of true negatives (i.e. non-represented cell types). FR-Match was applied to two human brain scRNAseq datasets sampled from cortical layer 1 and full thickness middle temporal gyrus. When mapping cell types identified in specimens isolated from these overlapping human brain regions, FR-Match precisely recapitulated the laminar characteristics of matched cell type clusters, reflecting their distinct neuroanatomical distributions. An R package and Shiny application are provided at <https://github.com/JCVenterInstitute/FRmatch> for users to interactively explore and match scRNAseq cell type clusters with complementary visualization tools.

**Keywords:** single cell RNA sequencing, data integration, feature selection, cell types, cellular neuroscience, non-parametric test

## 1 Introduction

2 Global collaborations, including the Human Cell Atlas [1] and the NIH BRAIN Initiative [2], are  
3 making rapid advances in the application of single cell/nucleus RNA sequencing (scRNAseq) to  
4 characterize the transcriptional profiles of cells in healthy and diseased tissues as the basis for  
5 understanding fundamental cellular processes and for diagnosing, monitoring, and treating  
6 human diseases. The standard workflow for processing and analysis of scRNAseq data  
7 includes steps for quality control to remove poor quality data based on quality metrics [3-5],  
8 sequence alignment to reference genomes/transcriptomes [6-8], and transcript assembly and  
9 quantification [8, 9] to produce a gene expression profile (transcriptome) for each individual cell.  
10 In most cases, these expression profiles are then clustered [10-13] to group together cells with  
11 similar gene expression phenotypes, representing either discrete cell types or distinct cell states.  
12 Once these cell phenotype clusters are defined, it is also useful to identify sensitive and specific  
13 marker genes for each cell phenotype cluster that could be used as targets for quantitative PCR,  
14 probes for *in situ* hybridization assays, and other purposes (e.g. semantic cell type  
15 representation where biomarkers can be used for defining cell types based on their necessary  
16 and sufficient characteristics [14, 15]).

17 A major challenge emerging from the broad application of these scRNAseq technologies is the  
18 ability to compare transcriptional profiles across studies. In some cases, basic normalization [16,  
19 17] or batch correction [18, 19] methods have been used to combine multiple scRNAseq  
20 datasets with limited success. Recently, several computational methods have been developed  
21 to address this challenge more comprehensively [20-25]. General steps in these methods  
22 include feature selection/dimensionality reduction and quantitative learning for matching. Scmap  
23 [20] is a method that performs cell-to-cell (scmapCell) and cell-to-cluster (scmapCluster)  
24 matchings. The feature selection step is unsupervised and based on a combination of

25 expression levels and dropout rates, pooling genes from all clusters in the reference dataset.  
26 Matching is based on agreement of nearest neighbor searching using multiple similarity  
27 measures. Seurat (Version 3) [21, 22] provides a cell-to-cell matching method within its suite of  
28 scRNAseq analysis tools. Feature selection is unsupervised and selects highly variable features  
29 in the reference dataset to define the high-dimensional space. Both query and reference cells  
30 are aligned in a search space projected by PCA-based dimensionality reduction and canonical  
31 correlation analysis, to transfer cluster labels through “anchors”. Among many others [23-25],  
32 these methods have focused on individual cell level strategies when comparing a query dataset  
33 to a reference dataset, not relying on clustering results to guide supervised feature selection or  
34 cluster-level matching.

35 Here, we present a supervised cell phenotype matching strategy, called FR-Match, for cluster-  
36 to-cluster cell transcriptome integration across scRNAseq experiments. Utilizing *a priori* learned  
37 cluster labels and computationally- or experimentally-derived marker genes, FR-Match uses the  
38 Friedman-Rafsky statistical test [26, 27] (FR test) to learn the multivariate distributional  
39 concordance between query and reference data clusters in a graphical model. In this  
40 manuscript, we first illustrate the matching properties of FR test in this scRNAseq adaptation  
41 using thorough simulation and validation studies in comparison with other popular matching  
42 methods. We then use FR-Match to match brain cell types defined in the full thickness of human  
43 middle temporal gyrus (MTG) neocortex with cell types defined in a Layer 1 dissection of MTG  
44 using public datasets from the Cell Types Database of the Allen Brain Map ([www.brain-  
45 map.org](http://www.brain-map.org)). We also report the cell types that are consistently matched between the two brain  
46 regions using multiple matching methods. An R-based implementation, user guide, and Shiny  
47 application for FR-Match are available in the open-source GitHub repository:  
48 <https://github.com/JCVenterInstitute/FRmatch>.

## 49 **Results**

## 50 ***FR-Match: cluster-to-cluster mapping of cell type clusters***

51 FR-Match, is a novel application of the Friedman-Rafsky test [26, 27], a non-parametric  
52 statistical test for multivariate data comparison, tailored for single cell clustering results. FR-  
53 Match takes clustered gene expression matrices from query and reference experiments and  
54 returns the FR statistic with p-value as evidence that the query and reference cell clusters being  
55 compared are matched or not, i.e. they share a common gene expression phenotype. The  
56 general steps of FR-Match (Figure 1a) include: i) select informative marker genes using, for  
57 example, the NS-Forest marker gene selection algorithm [14]; ii) construct minimum spanning  
58 trees for each pair of query and reference clusters (different colors); iii) remove all edges that  
59 connect a node from the query cluster with a node from the reference cluster, and iv) calculate  
60 FR statistics and p-values by counting the number of subgraphs remaining in the minimum  
61 spanning tree plots. Intuitively, the larger the FR statistic, the stronger the evidence that the cell  
62 clusters being compared represent the same cell transcriptional phenotype.

63 [Figure 1 here]

## 64 ***Supervised marker gene selection provides unique cell type clusters “barcodes”***

65 We adopted the NS-Forest algorithm [14] v2.0 (<https://github.com/JCVenterInstitute/NSForest>)  
66 to select informative marker genes for a given cell type cluster. Applying NS-Forest feature  
67 selection to the cortical Layer 1 and full thickness MTG datasets produced a collection of 34 and  
68 157 marker genes that, in combination, can distinguish the 16 cortical Layer 1 [28] and 75 full  
69 MTG [29] cell type clusters, respectively. These markers include well known neuronal marker  
70 genes like *SATB2*, *LHX6*, *VIP*, *NDNF*, *NTNG1*, etc. (Supplementary Figure 1). The selected  
71 marker genes display on-off binary expression patterns producing, in combination, a unique  
72 gene expression “barcode” for each cell cluster (Figure 1b). In addition to producing marker  
73 genes for each of the individual cell type clusters, this composite barcode serves as an effective

74 dimensionality reduction strategy that captures gene features that are informative for every cell  
75 type cluster. The collection of informative marker genes effectively creates an essential  
76 subspace that reflects the composite cell cluster phenotype structure in the single cell gene  
77 expression data. Thus, supervised feature selection by NS-Forest was used as the  
78 dimensionality reduction step for the FR-Match method in this study. Although NS-Forest was  
79 used for marker gene selection here, FR-Match is compatible with any feature  
80 selection/dimensionality reduction approach that selects informative cluster classification  
81 features.

## 82 ***Matching performance in cross-validation and simulation studies***

83 To assess the performance of FR-Match in comparison with other matching methods, we  
84 generated cross-validation datasets utilizing the cortical Layer 1 data and its known 15 cell type  
85 clusters for validation studies (excluding the smallest cluster in the original studies with too few  
86 cells). Matching was performed using six implementations of the three core methods: FR-Match  
87 (using NS-Forest genes), FR-Match incorporating p-value adjustment (FR-Match adj.), scmap  
88 (scmapCluster) with default gene selection (500 genes based on dropout proportions), scmap  
89 with NS-Forest marker genes (scmap+NSF), scmap with extended NS-Forest marker genes  
90 (scmap+NSF.ext) (see Methods section), and Seurat with default gene selection (top 2000  
91 highly variable genes). (Seurat with NS-Forest marker genes was not reported since the results  
92 were similar to the results obtained using default marker genes.)

## 93 **Cross-validation assessment of 1-to-1 positive matches**

94 In the two-fold cross-validation study, half of the cells serve as the query dataset and the other  
95 half as the reference dataset. Exactly one 1-to-1 true positive match should be identified for  
96 each cluster. Figure 2a displays the average matching rate over the cross-validation iterations,  
97 where true positives are expected to lay along the diagonal. Four implementations, FR-Match,

98 FR-Match adj., scmap+NSF.ext, and Seurat had excellent performance with 0.93~1 true  
99 positive rates (TPR) calculated as the grand average of the diagonal entries. Scmap using its  
100 default gene selection approach performed sub-optimally, especially for glial cell types. This is  
101 likely due to the fact that informative marker genes for these cell types were not selected using  
102 the dropout rate-based feature selection criterion (Supplementary Figure 2). However, using  
103 NS-Forest marker genes (scmap+NSF) instead of its default genes resulted in a significant  
104 improvement in scmap performance, suggesting that supervised feature selection is  
105 advantageous for cell type matching in general. FR-Match implementations had median  
106 matching accuracies approaching 0.98 and above, while the next tier performers,  
107 scmap+NSF.ext and Seurat, had median accuracies around 0.95 (Figure 2b). Sensitivity and  
108 specificity metrics further break down the accuracy measure and indicate the balance between  
109 the diagonal (true positive, a.k.a. sensitivity) and off-diagonal (true negative, a.k.a. specificity)  
110 matching performance. FR-Match after p-value adjustment is the only algorithm that identified  
111 all positive matches. Most methods had very high specificities, whereas FR-Match adj. had  
112 somewhat lower specificity due to slightly more false positives.

113 [Figure 2 here]

#### 114 **Cross-validation assessment of 1-to-0 negative matches**

115 Leave- $K$ -cluster-out cross-validation was used to test the performance of these methods under  
116 circumstances where one or more cell phenotypes is missing from the reference datasets, i.e. a  
117 situation where a novel cell type has been discovered. The left-out cluster(s) should have 1-to-0  
118 match(s) and should be unassigned. While FR-Match implementations clearly identified the left-  
119 out cluster as unassigned, other methods produced inappropriate matching when query cell  
120 types were missing from the reference dataset (Figure 3). Figure 3a shows results for when the  
121 i5 cluster was left out; Supplementary Figures 3-8 show results for when other cluster were left-

122 out in turn. Both FR-Match implementations easily identified the true negative match and  
123 correctly labeled the query i5 cluster as unassigned. Other methods partially or primarily mis-  
124 matched the query cluster (i5) to a similar yet distinct cluster (i1), as seen in the UMAP  
125 embedding where the query i5 nuclei are nearest neighbors to the reference i1 nuclei  
126 (Supplementary Figure 9). The accuracy measure for leave-1-cluster-out cross-validation again  
127 suggests that the FR-Match method is the best performer with median accuracies approaching  
128 0.99 (Figure 3b). Furthermore, as we removed more and more reference clusters, the FR-Match  
129 method showed robust precision-recall curve that consistently outperformed default  
130 implementations of scmap and Seurat in ROC analysis (Figure 3c). Seurat's curve deteriorated  
131 because its current implementation lacks an option for unassigned matches; therefore, all cells  
132 in the query dataset were forced to map somewhere in the reference dataset. Interestingly,  
133 scmap implementations with NS-Forest selected features also had robust precision-recall  
134 curves with respect to the increasing number of true negatives.

135 [Figure 3 here]

136 The leave- $K$ -cluster-out cross-validation has important implications for the capability of each  
137 matching method to detect novel cell types in new data sets that are not present in the  
138 reference datasets when integrating single cell experiments. In this important use case, the FR-  
139 Match method exhibits desirable properties for novel cell phenotype discovery.

#### 140 **Simulation of under- and over-partitioning during upstream clustering**

141 Accurate cell type determination from scRNAseq analysis is dependent on accurate partitioning  
142 of the cellular transcriptomes into clusters based on their similarity. Existing neuroscientific  
143 knowledge [28] suggests that the 15 cortical Layer 1 cell clusters are the current "optimal"  
144 clustering of the human brain upper cortical layer scRNAseq data. By combining and splitting  
145 these optimal cell type clusters, we simulated under- and over-partitioning scenarios of the



146 upstream clustering analysis. Figure 4a summarizes five cluster partitions ranging from 3 to 18  
147 clusters with F-measure scores indicating the classification power of partition-specific marker  
148 genes. The “Top nodes” under-partitioning combines clusters into the three top-level broad cell  
149 type classes: inhibitory neurons, excitatory neurons, and non-neuronal cells, producing well  
150 known GABAergic, glutamatergic, and neuroglia markers with high F-measure score. The “Mid  
151 nodes” under-partitioning combines three groups of closely related GABAergic clusters – i1 + i5,  
152 i3 + i4, and i6 + i8 + i9 – resulting in 11 clusters. Over-partitioning of either one (e1) or three (i1,  
153 i2, and i3) clusters was performed by running k-means clustering with  $k = 2$  independently for  
154 each cluster to simulate real over-partitioning scenarios.

155 [Figure 4 here]

156 It is important to note that over- and under-partitioning will also have an effect on the gene  
157 selection step; it would be predicted that marker gene selection algorithms would have difficulty  
158 finding maker genes specific for over-partitioned clusters, which would be reflected in the drop  
159 in F-measure scores. Indeed, particularly low F-measure scores may be a good indication of  
160 cluster over-partitioning. Figure 4b describes the expected effects on marker gene identification  
161 and FR-Match performance after p-value adjustment when clusters are under-, optimally-, and  
162 over-partitioned. The types of marker genes that would be selected with different reference  
163 cluster partitioning scenarios would impact their ability to effectively drive cluster matching.

164 Supplementary Figures 10-15 show the matching results of all considered matching methods in  
165 various partitioning scenarios. The FR-Match and Seurat methods showed good quality and  
166 expected matching results in most partitioning scenarios; scmap had the same problem with the  
167 unmatched glial clusters. Seurat showed excellent performance when reference clusters were  
168 under-partitioned, but poor performance when query clusters were under-partitioned. Overall,  
169 the FR-Match method had stable matching performance in the cluster partitioning simulations.

170 Indeed, 1-to-many and many-to-1 matching results using FR-Match could possibly indicate  
171 under- or over-partitioning of the upstream clustering step in scRNAseq data analysis.

## 172 **Simulation of scenarios in which imperfect marker genes are included**

173 Though we recommend using the NS-Forest algorithm to select the minimum set of informative  
174 marker genes, users may also want to use their own feature list as the input to FR-Match. There  
175 may be other cases where non-informative marker genes have been included. In order to  
176 assess the performance of FR-Match with respect to less than ideal marker gene lists, we use  
177 simulation to evaluate the matching performance in two scenarios: i) when there are non-  
178 informative (i.e. noisy) genes in the features selected, and ii) when some informative marker  
179 genes are missing from the feature list with or without non-informative genes. Throughout this  
180 simulation study, the FR-Match adj. implementation was used.

181 To simulate scenario (i), we used the 32 NS-Forest marker genes associated with the 15 cell  
182 types in the Layer 1 data, together with randomly selected genes from the 16,497 available  
183 genes in the dataset. In this scenario, the barcoding pattern of the informative marker genes  
184 were preserved, whereas the random genes showed more noisy and non-specific expression  
185 patterns in the “barcode” plots (Supplementary Figure 16a). In the simulations, we increased the  
186 number of extra genes added from 1 to 15; FR-Match was very robust to noisy genes in each  
187 simulated case with true positive rate staying close to 1 (Supplementary Figure 16b). Other  
188 performance measures – accuracy, sensitivity (true positive rate), and specificity (true negative  
189 rate) – all stayed well-above 0.9, suggesting that the overall performance of FR-Match was  
190 stable and robust, even when the marker gene list contained up to 30% non-informative genes  
191 (15 extra genes) (Supplementary Figure 16c). Increasing the number of non-informative genes  
192 may slightly impact the specificity due to more false positives (off-diagonal intensities in

193 Supplementary Figure 16b) and therefore leads to the slight downward trend of the overall  
194 accuracy.

195 For simulation scenario (ii), we generated two subcases to illustrate the impact of interfering  
196 with different combinations of marker genes on the matching performance. In the first subcase,  
197 we removed marker genes for three very distinct cell types: an excitatory cell type (e1), a glial  
198 cell type (g1), and an inhibitory cell type (i1); and used the remaining NS-Forest marker genes  
199 to match all cell types in the Layer 1 dataset. Surprisingly, each cell type was matched correctly  
200 most of the time with an overall true positive rate of 0.98 (Supplementary Figure 17a). We also  
201 replaced the removed marker genes with the same number of random genes; the matching  
202 performance was also very good, and the impact of the changes in the marker gene list was  
203 insignificant (Supplementary Figure 17a). In the second subcase, we considered  
204 removing/replacing the marker genes for two related inhibitory cell types: i1 and i2. Without  
205 marker genes that distinguish these similar cell types, FR-Match matched the i1 and i2 cell  
206 types to each other (i.e. a many-to-many match) while maintaining the distinction from other cell  
207 types with informative classification markers (Supplementary Figure 17b). The “barcode” plots  
208 for i1 and i2 became generally non-selective with random expression of some other inhibitory  
209 markers in the background (Supplementary Figure 17c). Such indistinct “barcode” plots may be  
210 an effecting warning for many-to-many matches. The absence of good classification markers is  
211 most harmful to specificity (due to false positives), while sensitivity (true positive rate) remains  
212 high (Supplementary Figure 17d).

213 In summary, as long as informative marker genes with good classification power are selected,  
214 FR-Match is robust to other non-informative genes included in the feature list. Many-to-many  
215 matching results by FR-Match may be a good indicator of the absence of informative marker  
216 genes between the mis-matched cell types.

## 217 ***Cell type mapping between cortical Layer 1 and full MTG***

218 We next extended the validation testing to a more realistic real-world scenario where a new  
219 dataset has been generated in the same tissue region using slightly different experimental and  
220 computational platforms. We tested FR-Match with p-value adjustment using two single nucleus  
221 RNA sequencing datasets from overlapping human brain regions – the single apical layer of the  
222 MTG cerebral cortex (cortical Layer 1), in which 16 discrete cell types were identified [28], and  
223 the full laminar depth of the MTG cerebral cortex, in which 75 distinct cell types were identified  
224 [29]. We selected NS-Forest combinatorial marker genes separately for each dataset. The  
225 marker gene sets may contain overlapping genes for some cell types, e.g. *CUX2* is a useful  
226 marker gene for more than one layer 2-3 cell types in combination with other marker genes;  
227 classification power of these combinatorial marker genes are evaluated in detail in another  
228 study [30].

229 Matching results were assessed from two perspectives: i) agreement with prior knowledge such  
230 as layer metadata from the design of these experiments [28, 29], and ii) agreement with other  
231 matching methods. Since these datasets targeted the same cortical region with overlapping  
232 laminar sampling, we expect that matching algorithm should find 1-to-1 matches of each cell  
233 types in the cortical Layer 1 data to one cell type in layers 1-2 from the full MTG data. The final  
234 matching results were concluded from two matching directions: Layer 1 query to MTG reference  
235 with MTG markers, and MTG query to Layer 1 reference with Layer 1 markers. The two-way  
236 matching approach was applied to all comparable matching algorithms.

## 237 **FR-Match uniquely maps cell types reflecting the overlapping anatomic regions**

238 Using FR-Match, we mapped each of the 13 Layer 1 cell types uniquely to one MTG cell type  
239 (Figure 5a), i.e. 1-to-1 two-way matches. These matches precisely reflect the overlapping  
240 anatomic regions in these two independent experiments in that the matched MTG cell types all

241 have an “L1” layer indicator in their nomenclature. The one exception for the Layer 1 e1 cluster  
242 likely reflects the incidental capture of upper cortical layer 2 excitatory neurons in the original  
243 Layer 1 experiment [28]. And while most of the *SST* cell subtypes are located in deeper cortical  
244 layers, FR-Match specifically selected the small number of L1 *SST* clusters as top matches. The  
245 same was true for *VIP* and *LAMP5* cell subtypes. The minimum spanning tree plots produced by  
246 FR-Match provide a clear visualization of matched and unmatched cell clusters (Figure 5b).

247 [Figure 5 here]

248 To validate further, we compared the matching results to the hierarchical taxonomy of MTG cell  
249 types [29], which reflects cell type relatedness (left side of Figure 5a). First, the block of one-  
250 way matches in Box A precisely corresponds to a specific sub-clade of *VIP*-expressing cells with  
251 close lineage relationships, suggesting that one-way FR-Match results are evidence of closely  
252 related cell types. Second, FR-Match correctly identified excitatory neurons that were  
253 incidentally captured from upper Layer 2 in the cortical Layer 1 experiment in Box B,  
254 corresponding to L2/3 excitatory neurons in the full MTG dataset. Third, Box C suggests under-  
255 partitioning of the Layer 1 astrocyte cluster as multiple two-way matches were found for the  
256 same cluster.

257 Directional one-way matching results are shown in Supplementary Figure 18. Though different  
258 matching patterns are observed from each direction, they reflect the fact that these datasets are  
259 measuring different cell types. There are some cases where the difference might be due to the  
260 cell complexity in the datasets, e.g. the *VIP* or *SST* types, and this might be leading to the  
261 dynamic range and skewness of p-value distributions for each query cluster.

262 **Cell type mapping using other existing approaches**

263 In mapping cell types between cortical Layer 1 and the full MTG, both FR-Match and Seurat  
264 produced similar unique two-way matches (Figure 6). Examining all matching results and all  
265 matching algorithms, FR-Match produced the most “conservative” mapping of cell types. The  
266 other matching algorithms produced matching results that had more sparsely-distributed *VIP*  
267 types (Box A), and were not laminar specific (Box B). Among all approaches, glial cell types  
268 were mapped somewhat differently (Box C), probably due to their overall lower sampling and  
269 distinct phenotypes compared to the majority of GABAergic and glutamatergic neurons.

270 [Figure 6 here]

271 FR-Match shows three advantages over the alternative methods. First, by using supervised  
272 feature selection for each cell type, major and minor cell populations are equally represented in  
273 the reduced-dimensional space for cell type matching. This strategy would also benefit other  
274 matching methods with sub-optimal feature selection/dimensionality reduction. Second, FR-  
275 Match clearly excludes the matching of cell types that are only present in one of the datasets.  
276 Third, FR-Match allows one-to-multiple and unassigned matches, which allows for detecting  
277 potential cluster partitioning issues and the discovery of novel cell types.

278 The other existing cell-level matching approaches naturally provide the probabilistic cluster-level  
279 matching of cell types as the percentage of matched cells in query cluster (Supplementary  
280 Figures 19-22); a deterministic cluster-level match would depend on the selection of an *ad-hoc*  
281 cutoff of the probabilistic matching. Thus, deterministic cell type mapping or discovery of novel  
282 cell types would be difficult as i) individual cells may be alike in the same broad cell class even if  
283 the specific cell type may not be present in the reference dataset, and ii) the probabilistic cutoff  
284 may be subjective. Therefore, both scmap and Seurat identified many more non-specific one-  
285 way matches than FR-Match, which uses an objective p-value cutoff.

286 Combining all results, we finally report 15 high-confidence ensemble matches between Layer 1  
287 and full MTG cell types in Supplementary Table 1.

## 288 **The effects of alternative gene selection and cell clustering methods on matching** 289 **performance**

290 To further elucidate the impact of alternative gene selection or cell clustering choices on cluster  
291 matching, we performed the following analyses.

292 In the two brain datasets, cell types are defined and characterized by a domain knowledge-  
293 guided iterative clustering [13] and transcriptomically-derived markers [28, 29]. The  
294 nomenclature used to describe these cell types consists of the broad cell class (inhibitory,  
295 excitatory, and glial cells), layering information (for the MTG dataset), one marker gene for the  
296 subclass node in the taxonomy tree (e.g. *VIP*, *SST*, etc.), and one marker gene for the leaf node  
297 cluster. For example, the “Inh\_L1\_2\_PAX6\_CDH12” from the MTG dataset means the inhibitory  
298 neurons located in layer 1-2 within the *PAX6*-subclass/subbranch expressing *CDH12*. The leaf  
299 node marker genes are preferentially selected by a binary scoring scheme [29] different from  
300 the one used by NS-Forest. Thus, the “cell type naming genes” provide an alternative  
301 informative marker gene set.

302 To assess matching performance using a different set of informative marker genes, we replaced  
303 the NS-Forest marker genes by these cell type naming genes for both datasets, followed by the  
304 same matching approaches. 26 and 87 naming genes were defined for the Layer 1 and full  
305 MTG datasets, respectively, out of which, 9 and 18 genes are in common between the naming  
306 genes and the NS-Forest marker genes, respectively. Using cell type naming genes, FR-Match,  
307 scmap, and Seurat all performed slightly differently with less ideal matching patterns  
308 (Supplementary Figure 23). Overall fewer matches were identified; and the identified matches  
309 were less specific (i.e. mapping to neighboring cell types). This is probably because using only

310 one leaf node marker gene may not be enough to fully capture the differences between those  
311 closely related leaf node cell types. From these matching results, we may conclude that NS-  
312 Forest selects better sets of informative markers than the other approach in this example, which  
313 has an impact on all three matching methods; less optimal feature selection will negatively  
314 impact matching regardless of the matching methods.

315 In another analysis, we compared the matching performance of FR-Match, scmap, and Seurat  
316 with respect to a different clustering method. The community detection Louvain method [10] is  
317 one of the most commonly used clustering methods for scRNAseq analysis. We applied Louvain  
318 clustering (implemented in the Seurat R package, with resolution = 1) to the full MTG dataset,  
319 which resulted in 26 reasonably segregated clusters in the UMAP low-dimensional embedding  
320 space (Supplementary Figure 24a). Matching results with the Louvain clusters are shown in  
321 Supplementary Figure 24b. FR-Match produced similar matching results regardless of the  
322 clustering methods: each Layer 1 cluster is strongly matched (two-way match) to some Louvain  
323 cluster of the full MTG dataset. Many-to-one and one-to-many matches are observed since the  
324 generic Louvain method appears to have under-partitioned the data in comparison with the  
325 original expert-curated iterative clusters, which agrees with the matching patterns we observed  
326 in our simulations. Matching by scmap and Seurat with the Louvain clusters shows the same  
327 problems as with the original clusters, i.e. excessive unassigned matches (scmap), and non-  
328 specific matches of the Layer 1 excitatory cluster (scmap and Seurat). Using different clustering  
329 methods will lead to different matching results depending on the clustering quality. As long as  
330 the clusters are reasonably good, FR-Match is able to detect high quality matches regardless of  
331 the clustering methods.

### 332 **Cell type matching using batch integration**



333 To date, there are more than 10 methods that have been proposed to correct the batch effects  
334 of scRNAseq data; among them, Harmony [31], LIGER [32], and Seurat 3 [21] are the  
335 recommended algorithms for batch integration [33]. Only Seurat is an end-to-end pipeline that  
336 inputs multiple scRNAseq data batches and outputs cell-to-cell alignment between batches. By  
337 summarizing the cell-level batch integration with prior cluster memberships of the cells, we  
338 compared the performance of Seurat for cell type matching with FR-Match in previous  
339 subsections. In this subsection, we implemented a workaround for Harmony and LIGER to  
340 transfer the batch integration outputs to produce putative cell type matches.

341 We applied Harmony (Supplementary Figure 25-26) and LIGER (Supplementary Figure 27-28)  
342 individually to integrate the Layer 1 and MTG datasets; both methods showed effective “batch-  
343 effect” removal in the UMAP (Supplementary Figure 25b-c) or tSNE (Supplementary Figure  
344 27b-c) low-dimensional embedding. For both Harmony and LIGER, the outputs from the  
345 algorithms are the integrated cells in some dimensionally reduced spaces; joint clustering can  
346 then be conducted on the integrated data spaces (Supplementary Figure 25d, Supplementary  
347 Figure 27d); and cell type matching can be inferred from the “river” plots (Supplementary Figure  
348 26a, Supplementary Figure 28a) between the input batches through the common joint clusters.  
349 We transferred the river plot to a one-to-one correspondent cell type matching heatmap, with  
350 each match indicating there exists a path between the two cell types in the river plot. Note that  
351 the heatmap is non-directional for a given set of edges of the river plot. Through such a  
352 workaround, we obtained cell type matching results for Harmony (Supplementary Figure 26b)  
353 and LIGER (Supplementary Figure 28b) in a similar format as FR-Match. It is clear that the  
354 batch integration approaches produce matches in blocks (i.e. many-to-many matches), and do  
355 not effectively yield the specific matches within these blocks if multiple related cell subtypes are  
356 presented. These batch integration methods were not originally designed for the task of cell type  
357 integration; therefore, it is not surprising that they produce sub-optimal results.

## 358 **Discussion**

359 FR-Match offers a cluster-level approach for mapping cell phenotypes identified in scRNAseq  
360 experiments. It extends the current cell-level matching algorithms by: i) borrowing information  
361 from all the cells in the same cluster using a statistical test that provides both probabilistic  
362 matching in p-values and objective p-value thresholds for deterministic matching, and ii)  
363 providing simple visualization of cell type data clouds in the minimum spanning tree graphical  
364 representation. Matching results of FR-Match are relatively conservative yielding highly specific  
365 matches, which can confirm cell type equivalence, lead to novel cell type discovery, and  
366 diagnose upstream clustering problems. Among many other scRNAseq data integration  
367 strategies, this approach combines informative feature selection and cluster-level integration of  
368 the NS-Forest and FR-Match software suites, producing intuitive results with high interpretability,  
369 including useful intermediate results such as binary marker genes and minimum spanning tree  
370 graphs for users to monitor and gain meaningful insights from the mapping solutions.

371 Based on the computational and statistical investigation of both simulated and real datasets, we  
372 conclude that: i) the FR-Match and Seurat methods show excellent performance in mapping  
373 neuronal and glial cell types using snRNAseq data from human brain; and ii) supervised feature  
374 selection, such as the NS-Forest algorithm, appears to produce excellent marker gene  
375 combinations that can be used as an effective feature selection/dimensionality reduction  
376 technique for cell type mapping with multiple methods, including FR-Match and scmap. Scmap  
377 is a consensus method that requires at least two of the three association metrics – cosine  
378 similarity, Pearson and Spearman correlations – to be in agreement as the last step to  
379 determine a match, thus the comparative analysis results of the matching methods reported  
380 here may also serve as a reference guide for matching performance using those association  
381 metrics.

382 One of the biggest challenges in scRNAseq alignment at the moment seems to be the proper  
383 assignment of cells from a cell type found in only one dataset. These cells are often matched to  
384 a closely related cell type in a second dataset. In this regard, FR-Match appears to be superior  
385 in being able to determine which cell types from two datasets are *not* matched, for novel cell  
386 type discovery.

387 For all compared methods in this study, it's interesting to note that under-partitioning the query  
388 clusters leads to degraded performance, except if the reference clusters are also under-  
389 partitioned. This suggests that a useful strategy would be to map to reference types in a  
390 hierarchical manner by first mapping to broad classes of references types and then moving  
391 down the tree to finer types until ambiguous matches appear. The negative effect of under-  
392 partitioned clusters also applies to the nested classes of heterogeneous cell types.

393 Automated cell type integration of independent scRNAseq datasets remains challenging.  
394 Creating an unbiased, high-resolution and comprehensive cell type reference would be a critical  
395 task for the whole single cell research community. Consensus mapping schemes that survey  
396 both cell-level and cluster-level matchings will be useful for establishing such a reference data  
397 atlas. We believe that final mapping of the brain cell types agreed upon by the type of bi-  
398 directionally and multi-level matchings reported here represents the best-practice for  
399 computational cell type mapping, requiring minimal expert intervention.

400 Single cell evaluation is a fast-evolving field. Although not fully explored here, we expect FR-  
401 Match to be applicable to cross-platform, cross-specimen, cross-anatomy, and cross-species  
402 matching of scRNAseq clustered data. The effect of dropouts and the dynamic range of single  
403 cell sequencing data from protocols other than the Smart-seq [34] protocol stand out as key  
404 challenges to be overcome. To address these challenges, we are now developing add-on  
405 features to the core FR-Match algorithm, including imputation techniques [35] for the relatively

406 high dropout rates in 10X Genomics droplet-based protocols [36], and moment-based  
407 normalization options [37] for the discrete and dispersed values produced in single cell spatial  
408 *in-situ* hybridization protocols [38-40]. Preliminary results of mapping Smart-seq cell clusters to  
409 10X cell clusters suggest that FR-Match will be useful for cross-platform cell type matching  
410 when appropriate dropout imputation and data normalization upstream steps are included in the  
411 computational pipeline (data not shown). While these emerging technologies will produce more  
412 complicated data integration challenges, the adaptation of methods like FR-Match are poised to  
413 play an essential role in the broad integration of scRNAseq cell phenotyping experiments.

## 414 **Methods**

### 415 ***The cell type matching problem***

416 Consider two single cell RNA sequencing experiments – one query/new experiment and one  
417 reference experiment. A cell-by-gene expression matrix for each experiment is obtained by  
418 standard scRNAseq data processing and analysis workflows, including quality control, reference  
419 alignment, sequence assembly, and transcript quantification. Cell cluster labels are also  
420 obtained from clustering analysis using, for example, the community detection Louvain  
421 algorithm [10], and/or other domain specific knowledge. These cell clusters represent  
422 transcriptionally-distinct cellular phenotypes within each experiment. The cell type matching  
423 problem is whether a pair of query and reference cell clusters identified in related but  
424 independent experiments are instances of the same or different transcriptionally-defined cell  
425 phenotypes.

426 We propose a computational solution to the cell type matching problem – FR-Match – an  
427 adaptation the Friedman-Rafsky statistical test for scRNAseq data, which takes two input  
428 datasets (query and reference) each with a gene expression matrix and cell cluster membership  
429 labels (Figure 1a). Importantly, FR-Match uses a set of informative marker genes that

430 characterize the reference cell type clusters. Dimensionality reduction is done by imposing the  
431 same set of marker genes on the query dataset, to select the most informative features shared  
432 with the reference dataset. For each pair of cross-dataset clusters, we perform cluster-to-cluster  
433 matching via the Friedman-Rafsky statistical test. As a result, FR-Match outputs the following  
434 types of match (format: query-to-reference): 1-to-0 or unassigned (indicative of a novel cell type),  
435 1-to-1 (indicative of a uniquely matched cell type), 1-to-many (indicative of an under-partitioned  
436 query cluster or over-partitioned reference cluster), many-to-1 (indicative of an over-partitioned  
437 query cluster or an under-partitioned reference cluster).

### 438 ***Necessary and sufficient marker gene identification by random forest***

439 In order to perform dimensionality reduction, random forest machine learning as implemented in  
440 the NS-Forest algorithm [14, 15, 30] (v2.0 at <https://github.com/JCVenterInstitute/NSForest>)  
441 was used to select necessary and sufficient marker genes for each reference cell type cluster.  
442 NS-Forest includes steps for: i) feature selection, ii) feature ranking, and iii) minimum feature  
443 determination. Let  $X$  be an  $n \times m$  dimensional cell-by-gene matrix, where  $n$  is the number of  
444 cells and  $m$  is the number of genes. Let  $y$  be an  $n \times 1$  vector of cluster labels. In step (i),  
445 random forest models, with 10,000 decision trees each, are built for input data  $X$  and each  
446 cluster label in  $y$  under a binary classification scheme. From each random forest model, the  
447 average information gain based on the Gini index for each gene is extracted, which is then used  
448 as a measure of feature importance to rank the gene features. In step (ii), for the top 15 ranked  
449 genes, a binary expression score for gene  $g$  in cluster  $k$  is calculated as

$$450 \quad \text{Score}_{g,k} = \frac{\sum_{k'=1}^K \left(1 - \frac{\text{med}_{g,k'}}{\text{med}_{g,k}}\right)^+}{K-1},$$

451 where  $\text{med}_{g,k}$  is the median expression level of gene  $g$  in cluster  $k$ ,  $K$  is the total number of  
452 clusters, and  $(\cdot)^+$  defines the non-negative value of the equation. The binary expression score

453 ranges from 0 to 1, where 1 indicates absolute binaryness, i.e. the gene exclusively expressed  
454 in the target cluster and not at all in non-target clusters. In step (iii), the top 6 genes from step (ii)  
455 are selected and all combinations are evaluated by the F-beta score. F-beta is an F-measure  
456 weighted by  $\beta$  such that

$$457 \quad F_{\beta} = (1 + \beta^2) \cdot \frac{\text{precision} \cdot \text{recall}}{\beta^2 \cdot \text{precision} + \text{recall}} .$$

458  $\beta = 0.5$  was set to weight precision more than recall, which compensates the effect of false  
459 negatives dropouts due to technical artifacts in scRNAseq experiments. The output from step (iii)  
460 is a minimum set of marker genes for each cell type cluster (usually 1 – 4), whose expression in  
461 combination is sufficient to discriminate the target cell type cluster from the rest of the cells. In  
462 addition to the minimum set of NS-Forest marker genes, the algorithm also provides an  
463 extended list of binary marker genes as a supplementary output from step (ii), which may  
464 achieve higher discriminative power under certain circumstances. The top 15 NS-Forest genes  
465 for each cell type formed an NS-Forest extended gene list as an alternative feature selection  
466 option for matching algorithms. For a more detailed discussion of the choice of the number of  
467 top genes used in NS-Forest v2.0, see Aevermann et al. [30]

#### 468 ***Friedman-Rafsky test***

469 The Friedman-Rafsky (FR) test [26] is a multivariate generalization of the non-parametric two-  
470 sample comparison problem. This classical statistical test is distribution free. Consider two  
471 general distributions  $F_X$  and  $F_Y$  for samples  $(x_1, \dots, x_m)$  and  $(y_1, \dots, y_n)$  in a  $k$ -dimensional space,  
472 respectively. (In the context of FR-Match, the  $x$ 's and  $y$ 's denote the expression profiles of each  
473 cell in the query and reference clusters;  $m$  and  $n$  are the number of cells in each cluster;  $k$  is  
474 determined by the number of informative marker genes from the reference dataset). Under the  
475 hypothesis testing framework, the original FR test is designed for testing

476  $H_0: F_X = F_Y$  versus  $H_1: F_X \neq F_Y,$

477 in which the null hypothesis states that the cells from both query and reference clusters are from  
478 the same transcriptional distribution; the alternative hypothesis states that the two cell  
479 populations are from different transcriptional distributions. Thus, the cell type matching problem  
480 becomes a statistical test to detect comparisons for which  $H_0$  is true.

481 The underlying model of the FR test is a graphical model based on the minimum spanning tree  
482 of pooled samples (Figure 1a). In the multi-dimensional informative marker gene space, cells  
483 from different clusters (indicated by colors) are pooled and form a mixture of data points. A  
484 complete graph can be constructed, which connects all cells to each other and uses the edge  
485 length to preserve the pairwise Euclidean distance between cells in the original space. Next, the  
486 complete graph is trimmed to a tree graph that connects all cells with the minimum total length  
487 of edges, i.e. the minimum spanning tree. Edges that connect cells of different clusters are then  
488 removed and the number of disjoint subtrees is counted. Intuitively, if there are a large number  
489 of subtrees, it implies that the pooled cells are closely interspersed and therefore more likely to  
490 be from the same multivariate gene expression distribution.

491 Formally, let  $R$  be the total number of subtrees – “multivariate runs” in the FR test framework,  
492 with mean  $E(R)$  and variance  $\text{Var}(R)$  directly derived from graph theory. The FR statistic is  
493 defined as

494 
$$W = \frac{R - E(R)}{\text{Var}(R)^{1/2}}.$$

495 Friedman and Rafsky showed that the asymptotic distribution of  $W$  follows a standard normal  
496 distribution for large sample sizes:

497 
$$W \sim N(0,1) \text{ as } m, n \rightarrow \infty \text{ with } m/n \text{ bounded away from } 0 \text{ and } \infty. \quad (1)$$

498 For the hypothesis testing purpose,  $H_0$  is rejected for small values of  $W$ , i.e. p-value is one-  
499 sided such that  $p = \Pr(W \leq w)$ . Note that, in the cell type matching application, we determine a  
500 *match* if  $p > 0.05$ , but other p-value thresholds could also be used.

### 501 ***FR-Match method***

502 Extending from the classical statistical test, FR-Match is a novel application of FR test to  
503 approach the cell type matching problem with scRNAseq data. The full FR-Match algorithm not  
504 only implements the basic testing procedure, but also adapts modifications for specific issues  
505 pertaining to the scRNAseq application. A major issue is that two cell clusters to be compared  
506 may have very different cluster sizes, such as a dozen cells versus hundreds of cells  
507 (Supplementary Figure 29). The unbalanced cluster sizes will often cause two problems: i)  
508 unstable statistical power as the ratio of cluster sizes deviates from the asymptotic condition,  
509 and ii) exponentially long computational time needed for constructing minimum spanning tree for  
510 large number of cells. To address these problems, an iterative subsampling scheme was  
511 implemented, which repeatedly performs sampling without replacement of  $S$  cells, or all cells if  
512  $S >$  cluster size, from each cell cluster for  $B$  times. Default values of  $S$  and  $B$  are 10 and 1000,  
513 respectively, but are tunable. The median p-value of all iterations is outputted. Other  
514 modifications include filtering small clusters with less than  $C$  cells each, and p-value adjustment  
515 for multiple hypothesis testing correction. Empirically,  $C = 10$  was chosen for defining a cell type  
516 cluster with high confidence since it appeared to provide enough cell instances to be  
517 representative. It is suggested to set  $S = C$ , but it is not a necessary condition for the algorithm.  
518 A disproportionate ratio of  $S$  to  $C$  would adversely affect the underlying statistical assumptions  
519 due to the unmet asymptotic condition in Equation (1).

520 As an alternative to the asymptotic theory, permutation testing is a widely-accepted practical  
521 choice for approximating the null distribution of the FR statistic in a hypothesis testing



522 framework [41]. We designed a simple technical simulation to compare the statistical properties  
523 of the FR test, FR permutation test, and FR test with subsampling scheme, with respect to the  
524 major pragmatic concern of imbalanced cluster sizes that specifically pertains to the cell type  
525 matching problem. We generated multivariate data from a Multivariate Normal (MVN)  
526 distribution ( $k = 40$  dimensions). Random samples were drawn from  $(x_1, \dots, x_m) \sim MVN(\mu =$   
527  $0, \Sigma = I)$  and  $(y_1, \dots, y_n) \sim MVN(\mu = 0 + \delta, \Sigma = I)$ , where  $I$  is the identity matrix. Under the null,  
528  $\delta = 0$ , i.e. no location difference between the  $x$ - and  $y$ -samples; under the alternative, we set  
529  $\delta = 0.4$  for moderate location shift in their distributions. To simulate the imbalanced cluster sizes,  
530 we fixed one cluster size  $m = 10$  and varied the other cluster size  $n = 10, 20, 100, 200$ . The ROC  
531 analysis (Supplementary Figure 30) confirm that the permutation test is a very good  
532 approximation of the FR test based on asymptotic theory; however, both tests show  
533 deteriorating ROC curves when the sample sizes were very imbalanced ( $n = 200$ , blue curve).  
534 In contrast, FR test with subsampling shows the most ideal property – better ROC curve and  
535 larger AUC value – as sample size (i.e. cluster size in this context) increases. Therefore, the  
536 iteratively subsampling scheme was adopted in the FR-Match algorithm.

537 Though the subsampling parameter  $S$  was initially chosen based on practical considerations, we  
538 also provide more simulation results for guiding the choice of  $S$  here. Based on the same  
539 simulation design as above, we evaluated the AUC values for FR subsampling tests with  
540  $S = 10, 20, 30$ , and benchmarked with the FR test (Supplementary Figure 31). When both input  
541 cluster sizes  $m$  and  $n$  vary from 10 to 200, the FR subsampling test with  $S = 10$  outperforms all  
542 other choices with the FR test showing the highest AUC values in all simulated cases with  $m$   
543 and  $n$ . This is potentially due to the expectation that the choice of  $S$  should embrace the right  
544 balance between gathering enough samples to represent the whole cluster and avoiding local  
545 structures in the cluster (i.e. large subtrees of the same color in an MST). We believe this might  
546 be related to the “effective” dimensionality of the data space characterized by  $\Sigma$  and other

547 distributional properties, which will be an interesting topic for future statistical research. In this  
548 manuscript, the choice of  $S$  is supported by empirical evidence; readers should use their own  
549 judgement on the choice of  $S$  for their own datasets.

550 In the Layer 1 and full MTG matching analysis reported in this manuscript, tunable parameters  
551 were set at the default values described above. When a sequence of FR-Match p-values were  
552 computed for each pair of Layer 1 cell type and MTG cell type, Benjamini & Yekutieli [42] p-  
553 value adjustment was applied for multiple hypothesis testing correction before the final  
554 determination of a cell type match.

### 555 ***Determining cluster-level match for the cell-level matching methods***

556 In comparison with other popular matching methods, a voting rule was adopted after obtaining  
557 the cell-level matching results from algorithms scmap (cell-to-cluster) and Seurat (cell-to-cell).  
558 Scmap provides a map: query cell  $\rightarrow$  reference cluster. We calculate the % of reference cluster  
559 labels grouped by the query cell labels, and thereby obtain a quantitative measure ranging from  
560 0 to 1 that indicates the probability of being the same cell type between the query and reference  
561 cell clusters. Similarly, the Seurat alignment is extended to query cell  $\rightarrow$  reference cell  $\rightarrow$   
562 reference cluster, and calculate the cluster-to-cluster matching measure in the same way. For a  
563 specific query cluster, its cluster-level match is determined by the votes of its member cells for  
564 their mapped reference cluster labels. An ad-hoc threshold at 30% was used for defining a  
565 deterministic match, which accounts for both the detection of a substantial proportion of query  
566 cells matched to one reference cluster and the possibility that some query clusters might be  
567 matched to multiple reference clusters. If the 30%-criterion is not met, then the query cluster is  
568 defined as unassigned in the matching results. The cluster-level matching results may change  
569 depending on the ad-hoc threshold used. For example, if changing the threshold to 40%, Seurat  
570 would identify the same set of two-way matches, but with three fewer one-way matches

571 (Supplementary Figure 32). A data-driven decision on such a threshold can be guided by the  
572 distribution of % of matched cells in Supplementary Figures 19-22.

### 573 ***Cross-validation and simulation design***

574 Data generation for the cross-validation and simulation studies were from the cortical Layer 1  
575 data with 15 cell clusters [28] (excluding one cluster, i11, with too few cells). All cross-validation  
576 designs were two-fold by evenly splitting data into training and testing in proportion to the  
577 original cluster sizes. All cross-validations were repeated 20 times each design.

578 Real data-guided simulations were used to mimic under-/over-partitioned scenarios (Figure 4).  
579 “Top nodes” under-partitions are cells merged into three broad classes: GABAergic inhibitory  
580 neurons, glutamatergic excitatory neurons, and neuroglial cells. “Mid nodes” under-partitions are  
581 cells merged into similar inhibitory neurons according to the constellation diagram of cluster  
582 network from the original study [28]; for the purpose of simulation, i1 and i5, i3 and i4, and i6, i8,  
583 and i9 were merged. For over-partitions, large cell clusters were split by running k-means  
584 clustering with  $k = 2$  independently for each over-partitioned cluster. “Split e1” divided the  
585 excitatory cluster into two sub-clusters of sizes 180 and 119 cells, resulting in 16 (= 15 + 1)  
586 over-partitioned clusters. “Split i1, i2, i3” divided each of the inhibitory clusters into two sub-  
587 clusters of sizes 56 and 34, 39 and 38, 32 and 24 cells, respectively, resulting in 18 (= 15 + 3)  
588 over-partitioned clusters in total. NS-Forest marker genes were identified for each of the  
589 simulated datasets. Matching performances of the under-/over-partitioned datasets were  
590 evaluated through two-fold cross-validation repeated 20 times.

### 591 **Data availability**

592 Two published single-nucleus RNA-seq datasets from the Allen Institute of Brain Science of  
593 human brain were used: i) cortical Layer 1 of middle temporal gyrus (MTG) [28] and ii) full

594 thickness MTG [29] (<https://portal.brain-map.org/atlas-and-data/rnaseq/human-mtg-smart->  
595 [seq](#)). The Layer 1 dataset contains expression data from 871 intact nuclei that form 16 cell type  
596 clusters, including four non-neuronal type clusters, one excitatory neuron type cluster, and 11  
597 inhibitory neuron type clusters. The MTG dataset contains filtered expression data from 15,603  
598 nuclei that form 75 cell type clusters, subdivided into six non-neuronal type clusters, 24  
599 excitatory neuron type clusters, and 45 inhibitory neuron type clusters. These cell type clusters  
600 are regarded as transcriptionally distinct cell types with nomenclature asserted after iterative  
601 clustering analysis [13]. Gene-level read count values were preprocessed to log-CPM (counts  
602 per million) values for all nuclei.

603 The same high level data processing steps were used for both datasets, although the details  
604 varied slightly:

- 605 1. Whole postmortem brain specimens or neurosurgical tissue samples were collected from  
606 adult male and female donors with 'control' condition (i.e. non-disease).
- 607 2. Nuclei were isolated from microdissected tissue pieces to avoid damage to neurons [43],  
608 and single nuclei were sorted using FACS instruments. The gating strategy included  
609 doublet detection gates and gates on neuronal marker NeuN signal.
- 610 3. RNA sequencing was performed using the SMART-Seq platform and multiplex library  
611 preparation.
- 612 4. STAR alignment of raw reads to human genome sequence, and sequence quantification  
613 using standard Bioconductor packages were performed. Gene expression levels were  
614 reported as counts per million (CPM) of exon and intron reads.
- 615 5. Nuclei passing quality control criteria were included for clustering analysis.
- 616 6. Iterative clustering procedure based on community detection were performed to group  
617 nuclei into transcriptomic cell types [13]. Dropouts were accounted for while selecting  
618 differentially expressed genes, and PCA was used for dimensionality reduction.

619 7. Clusters identified as donor-specific were flagged as outliers, and manually inspected for  
620 cluster-level QC before exclusion.

## 621 **Key Points**

- 622 • Feature selection plays a key role in scRNAseq data integration of cell type clusters;  
623 using supervised feature selection instead of approaches based on dropout rates  
624 significantly improves the performance of existing cell type matching methods, e.g.  
625 ‘scmap’.
- 626 • The random forest-based ‘NS-Forest’ marker gene selection algorithm is an effective  
627 dimensionality reduction tool that produces an informative set of necessary and sufficient  
628 genes for characterizing reference cell types.
- 629 • The cluster-level cell type matching method ‘FR-Match’, which builds upon a non-  
630 parametric multivariate statistical test, shows robustness against missing reference cell  
631 types, i.e. novel query cell types.
- 632 • FR-Match precisely matched common cell types from two independent scRNAseq  
633 experiments that reflect the laminar characteristics of the two anatomically overlapping  
634 brain regions.
- 635 • FR-Match software provides barcode plots and minimum spanning tree graphs for the  
636 query and reference cell type clusters, which are user-friendly visualization tools for  
637 insightful data exploration of scRNAseq data clusters.

## 638 **Funding**

639 The development and assessment of FR-Match was funded by the JCVI Innovation Fund, the  
640 Allen Institute for Brain Science, and the Chan–Zuckerberg Initiative DAF, an advised fund of  
641 the Silicon Valley Community Foundation (2018-182730). The funding bodies had no role in the  
642 design or conclusions of this study.

643 **Author contributions**

644 Y.Z. and R.H.S. designed the study, conceived the statistical model, and wrote the manuscript.

645 Y.Z. and B.D.A. developed the software suites. Y.Z. and B.D.A applied the software to real data

646 analysis. Y.Z., B.D.A, T.E.B., J.A.M., and R.H.S. interpreted the real data analysis. R.D.H.,

647 T.E.B., J.A.M., R.H.S., and E.S.L. performed the single nucleus RNA sequencing experiments

648 used. R.H.S. and E.S.L. supervised the work.

649 **Yun Zhang** is a Staff Scientist and Biostatistician in the Informatics Department at the J. Craig

650 Venter Institute.

651 **Brian D. Aevermann** is Senior Bioinformatics Analyst in the Informatics Department at the J.

652 Craig Venter Institute.

653 **Trygve E. Bakken** is an Assistant Investigator at the Allen Institute for Brain Science.

654 **Jeremy A. Miller** is a Senior Scientist at the Allen Institute for Brain Science.

655 **Rebecca D. Hodge** is an Assistant Investigator at the Allen Institute for Brain Science.

656 **Ed S. Lein** is a Senior Investigator at the Allen Institute for Brain Science.

657 **Richard H. Scheuermann** is a Professor and Director in the Informatics Department at the J.

658 Craig Venter Institute.

659 **Figure Legends**

660 **Figure 1. FR-Match schematic and marker gene “barcodes”. (a)** FR-Match cluster-to-cluster

661 matching schematic diagram. Input data: query/new and reference datasets, each with cell-by-

662 gene expression matrix and cell cluster membership labels. Step I: dimensionality reduction by

663 selecting expression data of reference cell type marker genes from the query dataset. Here, we

664 use the NS-Forest marker genes selected for the reference cell types. Step II: Cluster-to-cluster  
665 matching through the Friedman-Rafsky (FR) test. From left to right: multivariate data points of  
666 cell transcriptional profiles (colored by cell cluster labels) in a reduced dimensional (reference  
667 marker gene expression) space; construct a complete graph by connecting each pair of vertices  
668 (i.e. cells); find the minimum spanning tree that connects all vertices with minimal summed edge  
669 lengths; remove the edges that connect vertices from different clusters; count the number of  
670 disjoint subgraphs, termed “multivariate runs” and denoted as  $R$ ; calculate the FR statistic  $W$ ,  
671 which has asymptotically a standard normal distribution. **(b)** “Barcodes” of the cortical Layer 1  
672 NS-Forest marker genes in four Layer 1 clusters. Heatmaps show marker gene expression  
673 levels of 30 randomly selected cells in each cell cluster. The “Marker” column indicates if the  
674 gene is a marker gene of the cluster or not (1=yes, 0=no).

675

676 **Figure 2. Cross-validation results.** Two-fold cross-validation were repeated 20 times on the  
677 cortical Layer 1 data with all clusters. Training (reference) and testing (query) data were evenly  
678 split in proportion to the cluster sizes. Cluster-level matching results for the cell-level matching  
679 methods were summarized as the most mapped cluster labels beyond a defined threshold (see  
680 Methods section). Matching output: 1 if a match; 0 otherwise. If a query cluster is not matched to  
681 any reference cluster, then it is unassigned. **(a)** Heatmaps show the average matching result for  
682 each matching method. True positive rate (TPR) is calculated as the average of the diagonal  
683 matching rates, i.e. true positives. **(b)** Median, interquartile range, and full range of accuracy,  
684 sensitivity, and specificity of all cluster-matching results in cross-validation for each matching  
685 method is shown.

686

687 **Figure 3. Leave- $K$ -cluster-out cross-validation results.** The same cross-validation settings  
688 as in Figure 2 were used. After data split,  $K \geq 1$  reference clusters were held-out to simulate the  
689 situation in which the query dataset contains one or more novel cell type clusters. **(a)** Heatmaps  
690 show the average matching result for each matching method when the i5 “rosehip” cluster was  
691 left out. **(b)** Accuracy, sensitivity, and specificity of the leave-1-cluster-out cross-validation  
692 performance for each matching method is shown. Each cluster was left out in turn, and  
693 performance was evaluated across all turns. **(c)** Precision-Recall Curves of the leave- $K$ -cluster-  
694 out cross-validation performance for  $K = 1, 3, 5,$  and  $7$  are shown and Area-Under-the-Curves  
695 (AUC) statistics are calculated. Performance was evaluated across 20 iterations of randomly  
696 selected  $K$  clusters. Curves for the FR-Match with and without p-value adjustment have the  
697 same shape since the adjustment preserves the order of p-values. Note that the Seurat  
698 package by default does not provide for unassigned cells/clusters as a direct output.

699

700 **Figure 4. Design of the under-, optimally-, and over-partitioned cluster simulations and**  
701 **their matching properties. (a)** A schematic of simulating cluster partitions. The optimal  
702 partitioning produced nodes where cells were consistently co-clustered across 100 bootstrap  
703 iterations for clustering and curated by domain expert knowledge [13, 28]. Connectivity (edge  
704 width) between nodes are measured by the number of intermediate cells/nuclei shared by  
705 similar nodes. Two under-partition scenarios, “Mid nodes” and “Top nodes”, were simulated by  
706 merging similar/hierarchically-connected nodes (e.g. i1 + i5 clusters and all inhibitory clusters,  
707 respectively). Two over-partition scenarios, split e1 and split i1, i2, and i3, were simulated by  
708 splitting those large size clusters by k-means clustering with  $k = 2$ . Median F-measure of the  
709 NS-Forest marker genes for each partition are reported in the table. **(b)** FR-Match properties  
710 and expected marker gene types with respect to under-, optimally-, and over-partitioned  
711 reference and query cluster scenarios, summarized from the simulation results (Supplementary



712 Figure 11). Green blocks in the table are cases with high true positive rate (TPR); red blocks are  
713 warning cases with low TPR.

714

715 **Figure 5. FR-Match results for cell type matching between the cortical Layer 1 and full**

716 **MTG datasets. (a)** Two-way matching results are shown in three colors: red indicates that a

717 pair of clusters are matched in both directions (Layer 1 query to MTG reference with MTG

718 markers, and MTG query to Layer 1 reference with Layer 1 markers); yellow indicates that a pair

719 of clusters are matched in only one direction; and blue indicates that a pair of clusters are not

720 matched. The hierarchical taxonomy of the full MTG clusters is from the original study [29]. FR-

721 Match produced 13 unique, and two non-unique two-way matches between the two datasets.

722 Box A shows densely located one-way matches in the subclade of *VIP*-expressing clusters. Box

723 B shows incidentally captured cells from upper cortical Layer 2 mixed in the Layer 1 e1 cluster.

724 Box C shows the non-unique two-way matches of astrocyte clusters. **(b)** Examples of matched

725 and unmatched minimum spanning tree plots from the FR-Match graphical tool. Top row:

726 examples of two-way matched inhibitory clusters. Middle row: examples of two-way matched

727 non-neuronal clusters. Bottom row: examples of unmatched excitatory clusters from different

728 layers. Legend: cluster name (cluster size).

729

730 **Figure 6. Cell type matching results between the cortical Layer 1 and full MTG datasets**

731 **using other matching methods.** Two-way cluster-level matching results for the cell-level

732 matching methods were summarized as the most mapped cluster labels beyond a defined

733 threshold (see Methods section). Box A shows matches in the *VIP*-expressing subclade. Box B

734 shows matches spanning multiple layers among the MTG clusters. Box C shows matches of

735 glial clusters.

## 736 References

- 737 1. Regev, A., et al., *The Human Cell Atlas*. Elife, 2017. **6**.
- 738 2. *The impact of the NIH BRAIN Initiative*. Nat Methods, 2018. **15**(11): p. 839.
- 739 3. Aevermann, B., et al. *Production of a preliminary quality control pipeline for single nuclei*  
740 *Rna-Seq and its application in the analysis of cell type diversity of post-mortem human*  
741 *brain neocortex*. in *PACIFIC SYMPOSIUM ON BIOCOMPUTING 2017*. 2017. World  
742 Scientific.
- 743 4. Ilicic, T., et al., *Classification of low quality cells from single-cell RNA-seq data*. Genome  
744 Biol, 2016. **17**: p. 29.
- 745 5. Islam, S., et al., *Characterization of the single-cell transcriptional landscape by highly*  
746 *multiplex RNA-seq*. Genome Res, 2011. **21**(7): p. 1160-7.
- 747 6. Kim, D., et al., *Graph-based genome alignment and genotyping with HISAT2 and HISAT-*  
748 *genotype*. Nature biotechnology, 2019. **37**(8): p. 907-915.
- 749 7. Dobin, A., et al., *STAR: ultrafast universal RNA-seq aligner*. Bioinformatics, 2013. **29**(1): p.  
750 15-21.
- 751 8. Li, H. and R. Durbin, *Fast and accurate short read alignment with Burrows-Wheeler*  
752 *transform*. Bioinformatics, 2009. **25**(14): p. 1754-60.
- 753 9. Pertea, M., et al., *StringTie enables improved reconstruction of a transcriptome from*  
754 *RNA-seq reads*. Nature biotechnology, 2015. **33**(3): p. 290.
- 755 10. Blondel, V.D., et al., *Fast unfolding of communities in large networks*. Journal of  
756 statistical mechanics: theory and experiment, 2008. **2008**(10): p. P10008.
- 757 11. Wolf, F.A., P. Angerer, and F.J. Theis, *SCANPY: large-scale single-cell gene expression*  
758 *data analysis*. Genome Biol, 2018. **19**(1): p. 15.
- 759 12. Kiselev, V.Y., et al., *SC3: consensus clustering of single-cell RNA-seq data*. Nature  
760 methods, 2017. **14**(5): p. 483.
- 761 13. Bakken, T.E., et al., *Single-nucleus and single-cell transcriptomes compared in matched*  
762 *cortical cell types*. PloS one, 2018. **13**(12): p. e0209648.
- 763 14. Aevermann, B.D., et al., *Cell type discovery using single-cell transcriptomics: implications*  
764 *for ontological representation*. Hum Mol Genet, 2018. **27**(R1): p. R40-R47.
- 765 15. Bakken, T., et al., *Cell type discovery and representation in the era of high-content single*  
766 *cell phenotyping*. BMC Bioinformatics, 2017. **18**(Suppl 17): p. 559.
- 767 16. Lun, A.T., K. Bach, and J.C. Marioni, *Pooling across cells to normalize single-cell RNA*  
768 *sequencing data with many zero counts*. Genome Biol, 2016. **17**: p. 75.
- 769 17. Bacher, R., et al., *SCnorm: robust normalization of single-cell RNA-seq data*. Nat  
770 Methods, 2017. **14**(6): p. 584-586.
- 771 18. Haghverdi, L., et al., *Batch effects in single-cell RNA-sequencing data are corrected by*  
772 *matching mutual nearest neighbors*. Nat Biotechnol, 2018. **36**(5): p. 421-427.
- 773 19. Polanski, K., et al., *BBKNN: fast batch alignment of single cell transcriptomes*.  
774 Bioinformatics, 2020. **36**(3): p. 964-965.
- 775 20. Kiselev, V.Y., A. Yiu, and M. Hemberg, *scmap: projection of single-cell RNA-seq data*  
776 *across data sets*. Nat Methods, 2018. **15**(5): p. 359-362.
- 777 21. Stuart, T., et al., *Comprehensive Integration of Single-Cell Data*. Cell, 2019.

- 778 22. Butler, A., et al., *Integrating single-cell transcriptomic data across different conditions,*  
779 *technologies, and species.* Nat Biotechnol, 2018. **36**(5): p. 411-420.
- 780 23. Hie, B., B. Bryson, and B. Berger, *Efficient integration of heterogeneous single-cell*  
781 *transcriptomes using Scanorama.* Nat Biotechnol, 2019. **37**(6): p. 685-691.
- 782 24. Lin, Y., et al., *scMerge leverages factor analysis, stable expression, and pseudoreplication*  
783 *to merge multiple single-cell RNA-seq datasets.* Proc Natl Acad Sci U S A, 2019. **116**(20):  
784 p. 9775-9784.
- 785 25. Johansen, N. and G. Quon, *scAlign: a tool for alignment, integration, and rare cell*  
786 *identification from scRNA-seq data.* Genome Biol, 2019. **20**(1): p. 166.
- 787 26. Friedman, J.H. and L.C. Rafsky, *Multivariate generalizations of the Wald-Wolfowitz and*  
788 *Smirnov two-sample tests.* The Annals of Statistics, 1979: p. 697-717.
- 789 27. Hsiao, C., et al., *Mapping cell populations in flow cytometry data for cross-sample*  
790 *comparison using the Friedman-Rafsky test statistic as a distance measure.* Cytometry A,  
791 2016. **89**(1): p. 71-88.
- 792 28. Boldog, E., et al., *Transcriptomic and morphophysiological evidence for a specialized*  
793 *human cortical GABAergic cell type.* Nat Neurosci, 2018. **21**(9): p. 1185-1195.
- 794 29. Hodge, R.D., et al., *Conserved cell types with divergent features in human versus mouse*  
795 *cortex.* Nature, 2019. **573**(7772): p. 61-68.
- 796 30. Aevermann, B., et al., *NS-Forest: A machine learning method for the objective*  
797 *identification of minimum marker gene combinations for cell type determination from*  
798 *single cell RNA sequencing.* bioRxiv, 2020.
- 799 31. Korsunsky, I., et al., *Fast, sensitive and accurate integration of single-cell data with*  
800 *Harmony.* Nature Methods, 2019. **16**(12): p. 1289-1296.
- 801 32. Welch, J.D., et al., *Single-cell multi-omic integration compares and contrasts features of*  
802 *brain cell identity.* Cell, 2019. **177**(7): p. 1873-1887. e17.
- 803 33. Tran, H.T.N., et al., *A benchmark of batch-effect correction methods for single-cell RNA*  
804 *sequencing data.* Genome Biology, 2020. **21**(1): p. 12.
- 805 34. Picelli, S., et al., *Full-length RNA-seq from single cells using Smart-seq2.* Nat Protoc, 2014.  
806 **9**(1): p. 171-81.
- 807 35. Zhang, L. and S. Zhang, *Comparison of computational methods for imputing single-cell*  
808 *RNA-sequencing data.* IEEE/ACM Trans Comput Biol Bioinform, 2018.
- 809 36. Zheng, G.X., et al., *Massively parallel digital transcriptional profiling of single cells.* Nat  
810 Commun, 2017. **8**: p. 14049.
- 811 37. Vallejos, C.A., et al., *Normalizing single-cell RNA sequencing data: challenges and*  
812 *opportunities.* Nat Methods, 2017. **14**(6): p. 565-571.
- 813 38. Moffitt, J.R., et al., *High-throughput single-cell gene-expression profiling with*  
814 *multiplexed error-robust fluorescence in situ hybridization.* Proc Natl Acad Sci U S A,  
815 2016. **113**(39): p. 11046-51.
- 816 39. Shah, S., et al., *In Situ Transcription Profiling of Single Cells Reveals Spatial Organization*  
817 *of Cells in the Mouse Hippocampus.* Neuron, 2016. **92**(2): p. 342-357.
- 818 40. Perkel, J.M., *Starfish enterprise: finding RNA patterns in single cells.* Nature, 2019.  
819 **572**(7770): p. 549-551.
- 820 41. Holmes, S. and W. Huber, *Modern statistics for modern biology.* 2018: Cambridge  
821 University Press.

- 822 42. Benjamini, Y. and D. Yekutieli, *The control of the false discovery rate in multiple testing*  
823 *under dependency*. Annals of statistics, 2001: p. 1165-1188.
- 824 43. Krishnaswami, S.R., et al., *Using single nuclei for RNA-seq to capture the transcriptome*  
825 *of postmortem neurons*. Nature Protocols, 2016. **11**(3): p. 499-524.
- 826

## a I. Dimensionality reduction

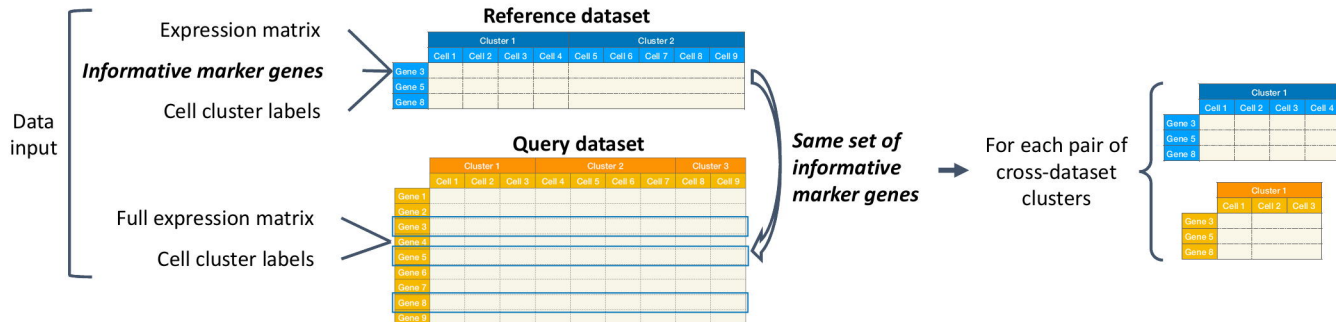

## II. Cluster-to-cluster matching

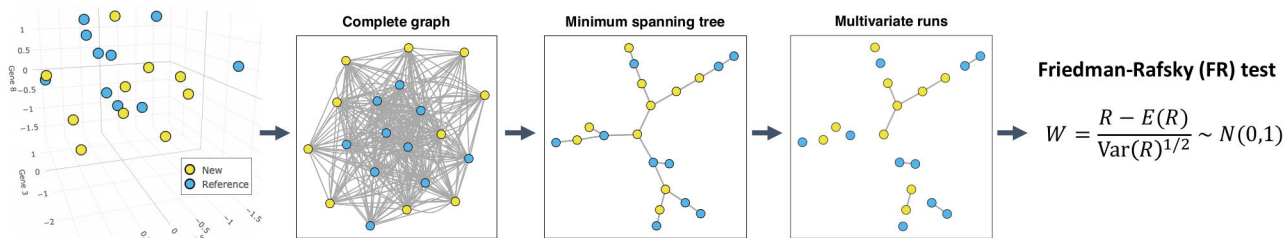

## b

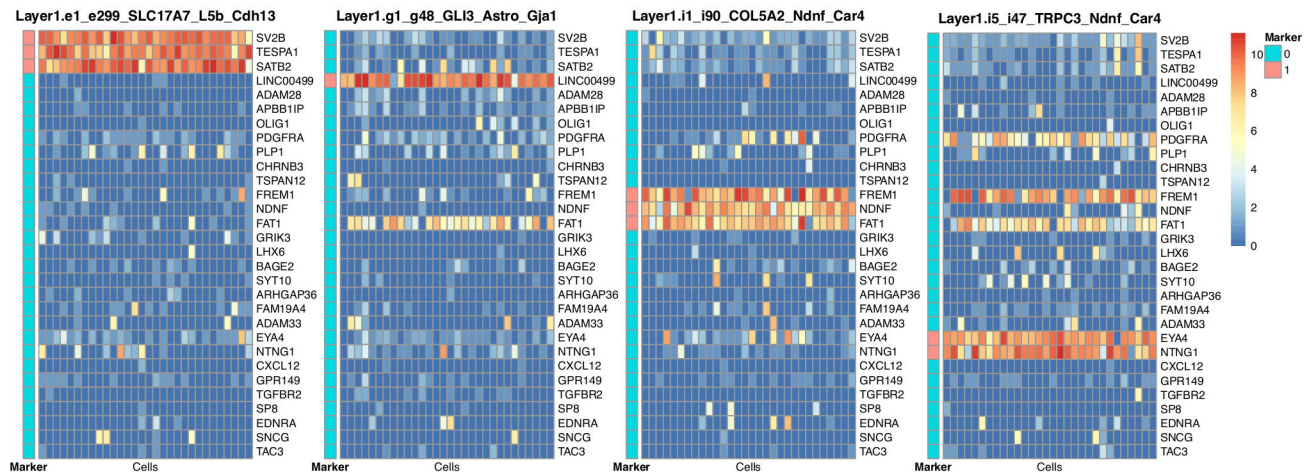

**a**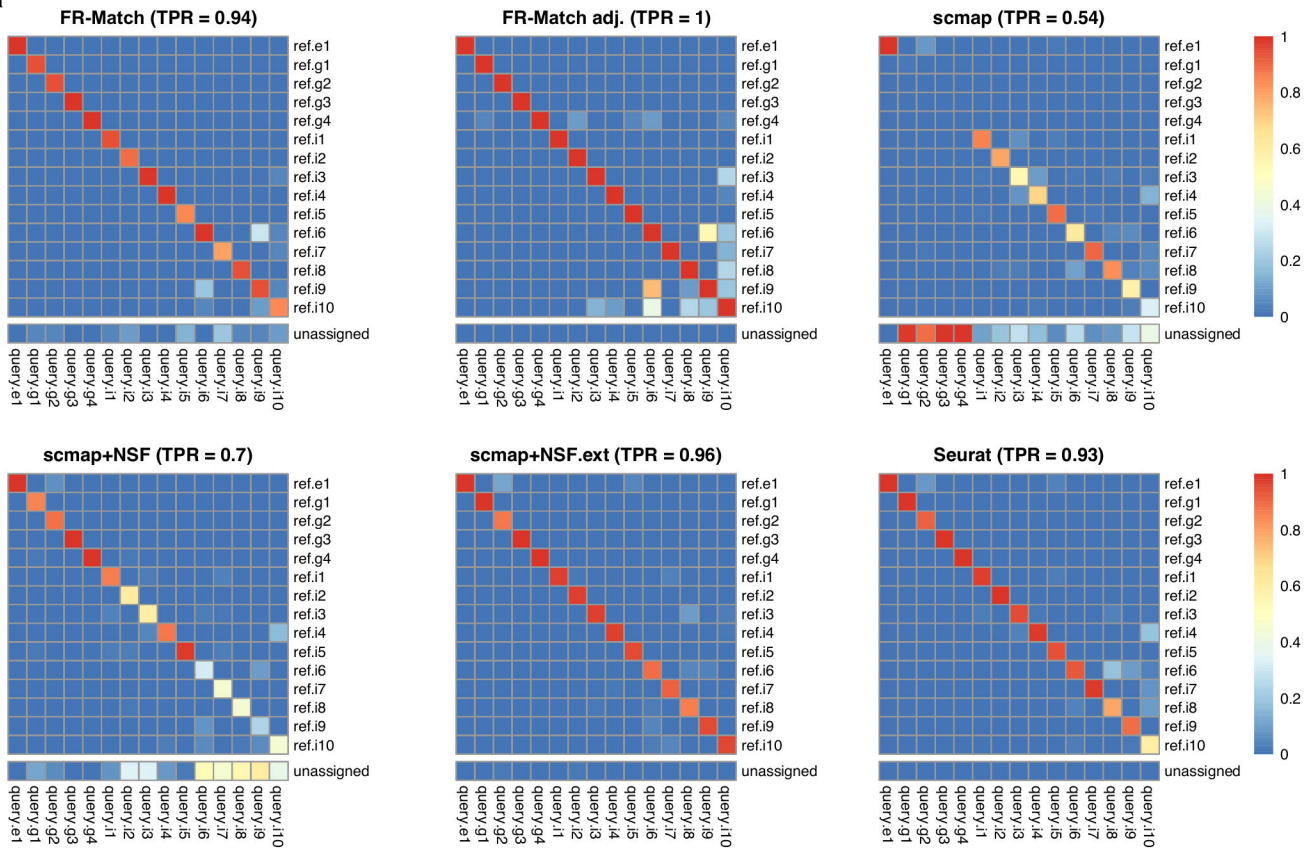**b**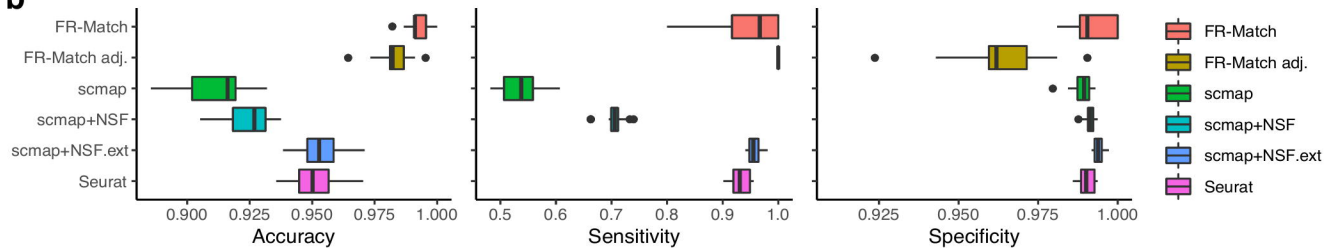

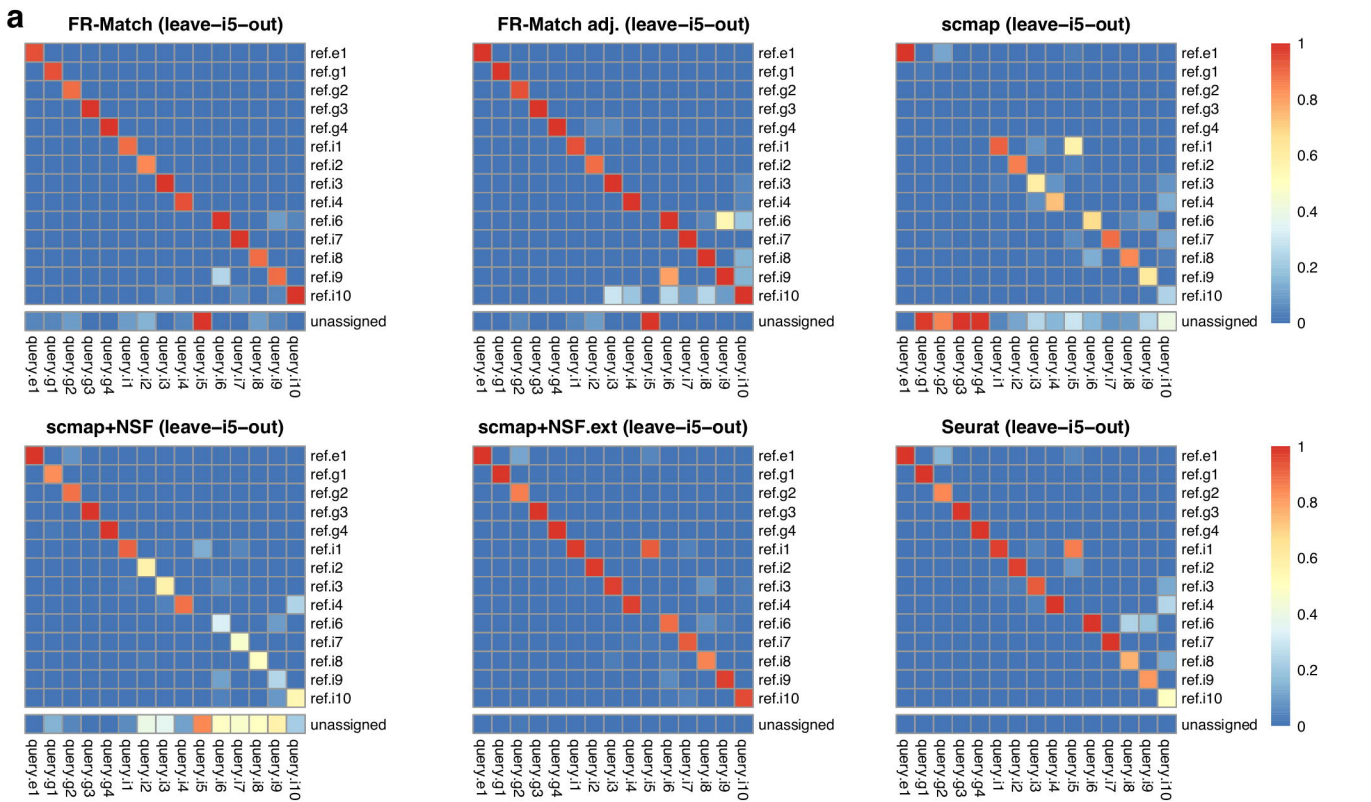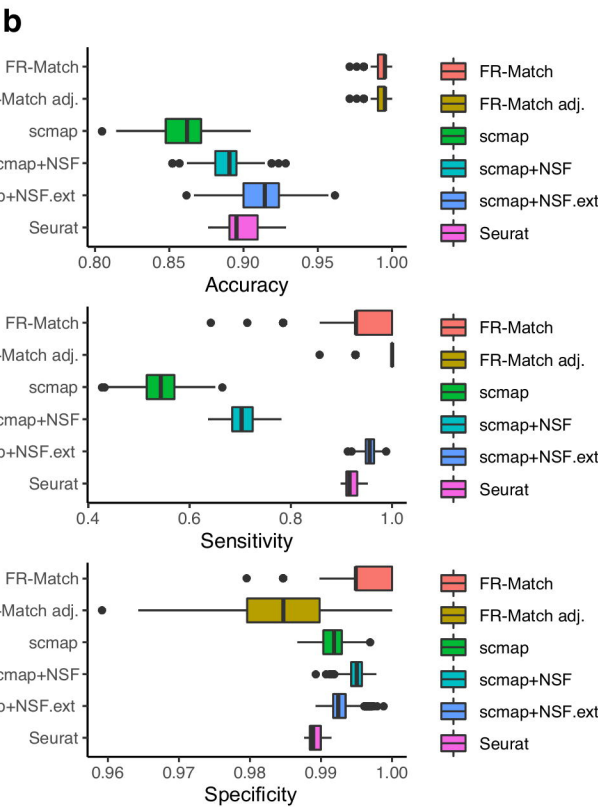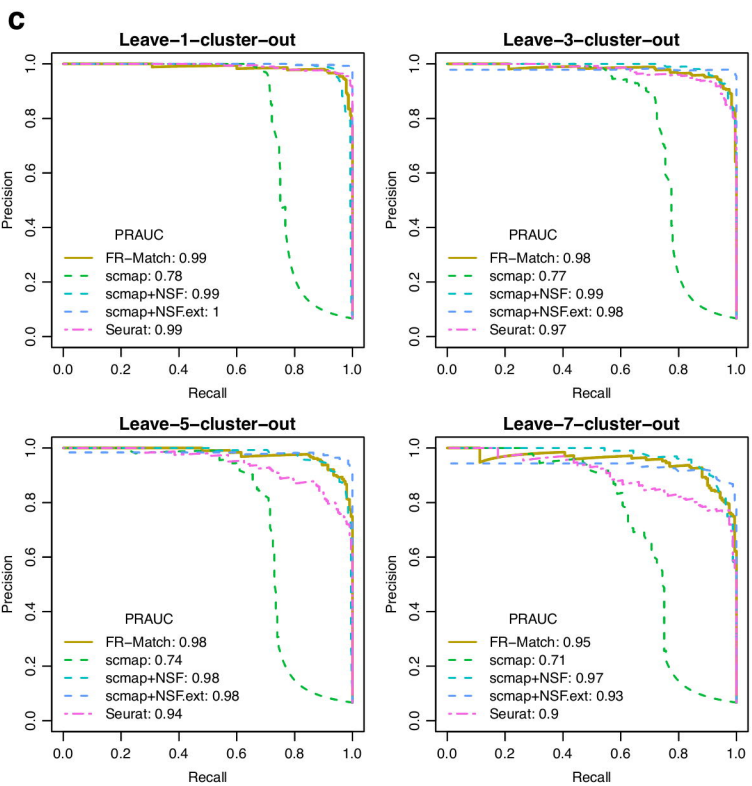

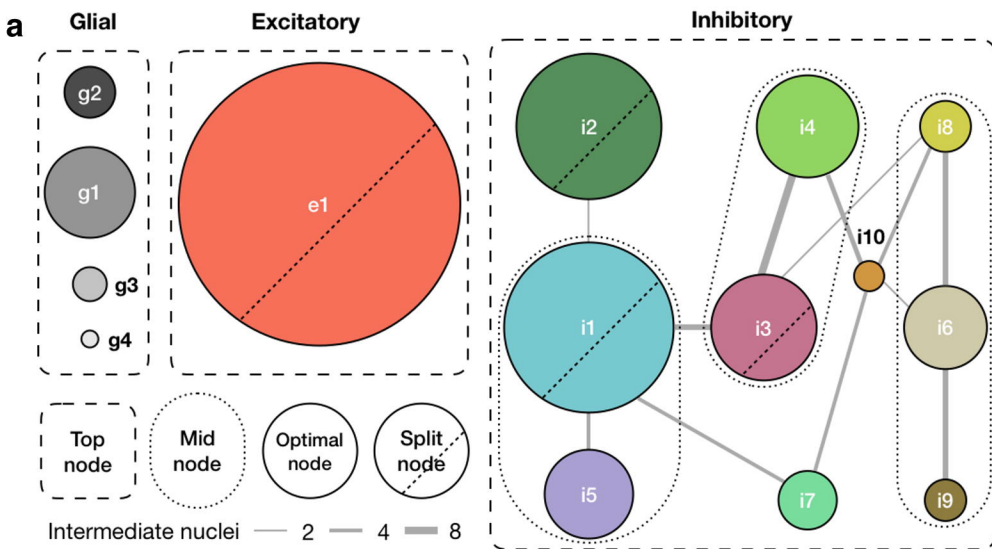

| Cluster partitioning |                         | # clusters | F-measure |
|----------------------|-------------------------|------------|-----------|
| Under-partition      | <b>Top nodes</b>        | 3          | 0.959     |
|                      | <b>Mid nodes</b>        | 11         | 0.929     |
| Optimal-partition    | <b>15 clusters</b>      | 15         | 0.874     |
| Over-partition       | <b>Split e1</b>         | 16         | 0.864     |
|                      | <b>Split i1, i2, i3</b> | 18         | 0.818     |

**b**

|                          | Partition<br><i>Marker type (F-measure)</i>         | Query cluster                      |                         |                            |
|--------------------------|-----------------------------------------------------|------------------------------------|-------------------------|----------------------------|
|                          |                                                     | Under-partition                    | Optimal-partition       | Over-partition             |
| <b>Reference cluster</b> | Under-partition<br><i>Common marker (higher)</i>    | 1-to-1<br>(TPR=0.98)               | Many-to-1<br>(TPR=0.94) | Many-to-1<br>(TPR=0.95)    |
|                          | Optimal-partition<br><i>Specific markers (high)</i> | 1-to-many or missing<br>(TPR=0.72) | 1-to-1<br>(TPR=1)       | Many-to-1<br>(TPR=0.99)    |
|                          | Over-partition<br><i>Noisy markers (low)</i>        | 1-to-many or missing<br>(TPR=0.78) | 1-to-many<br>(TPR=0.99) | Many-to-many<br>(TPR=0.94) |
|                          |                                                     |                                    |                         |                            |



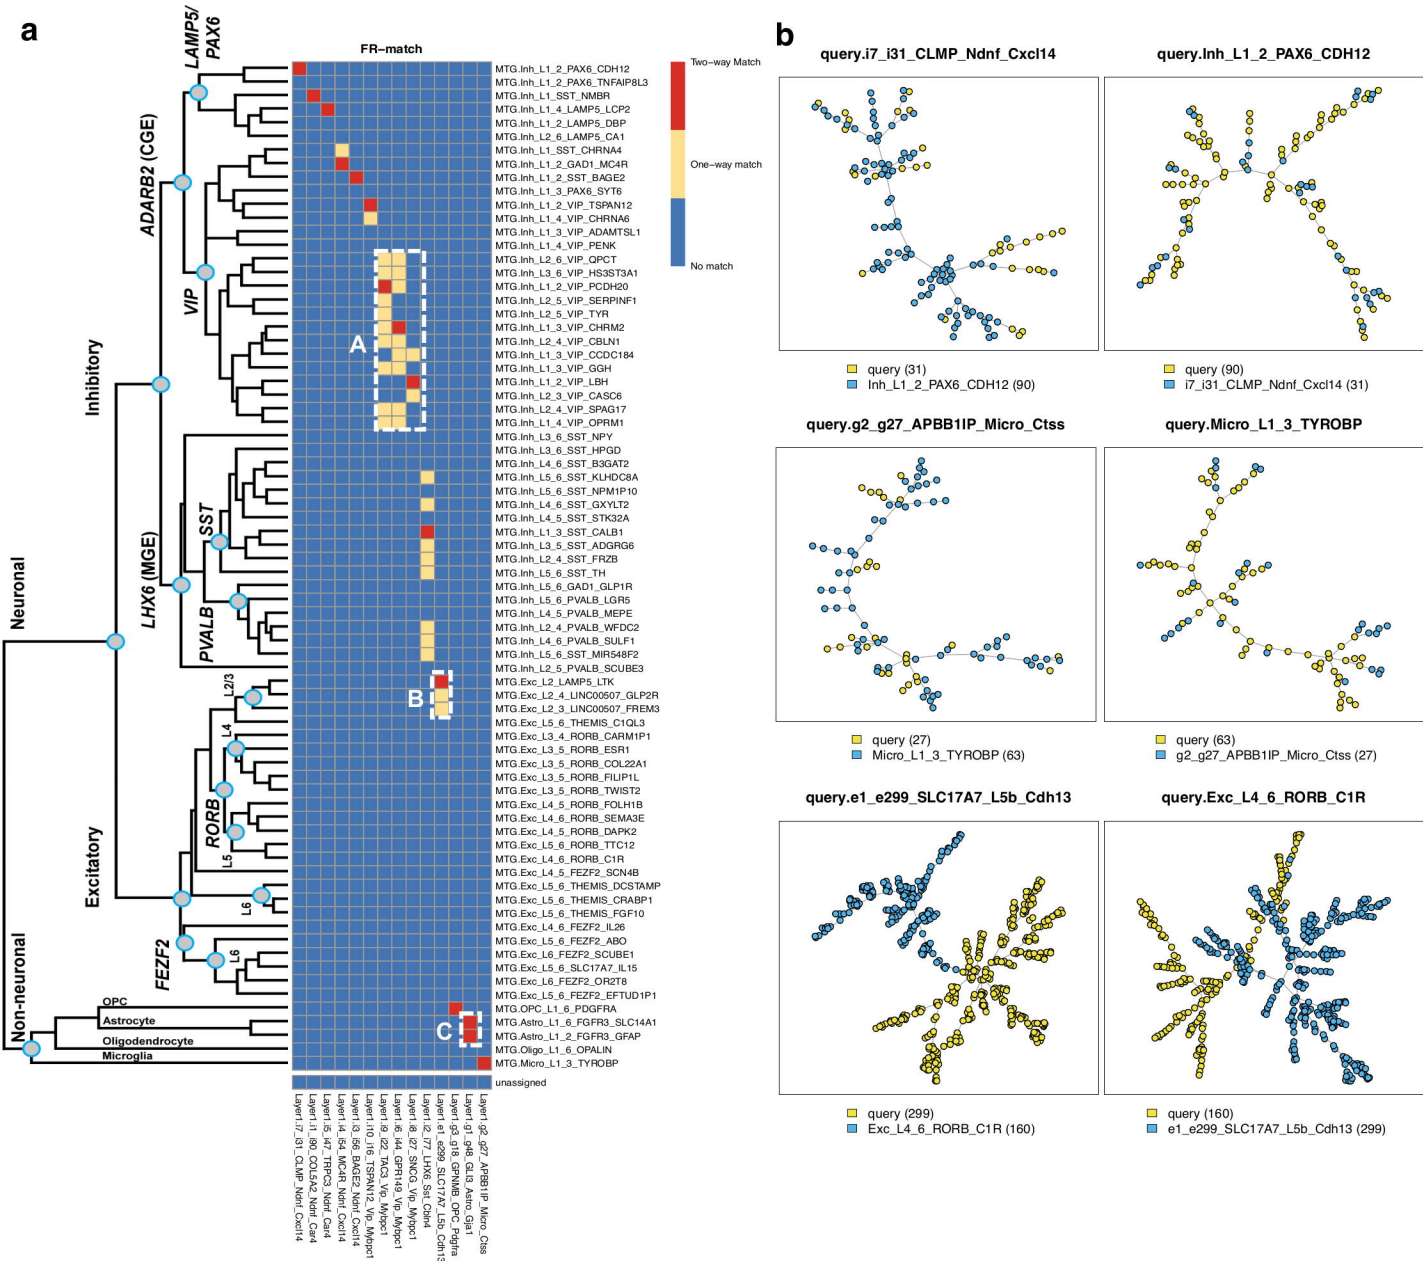

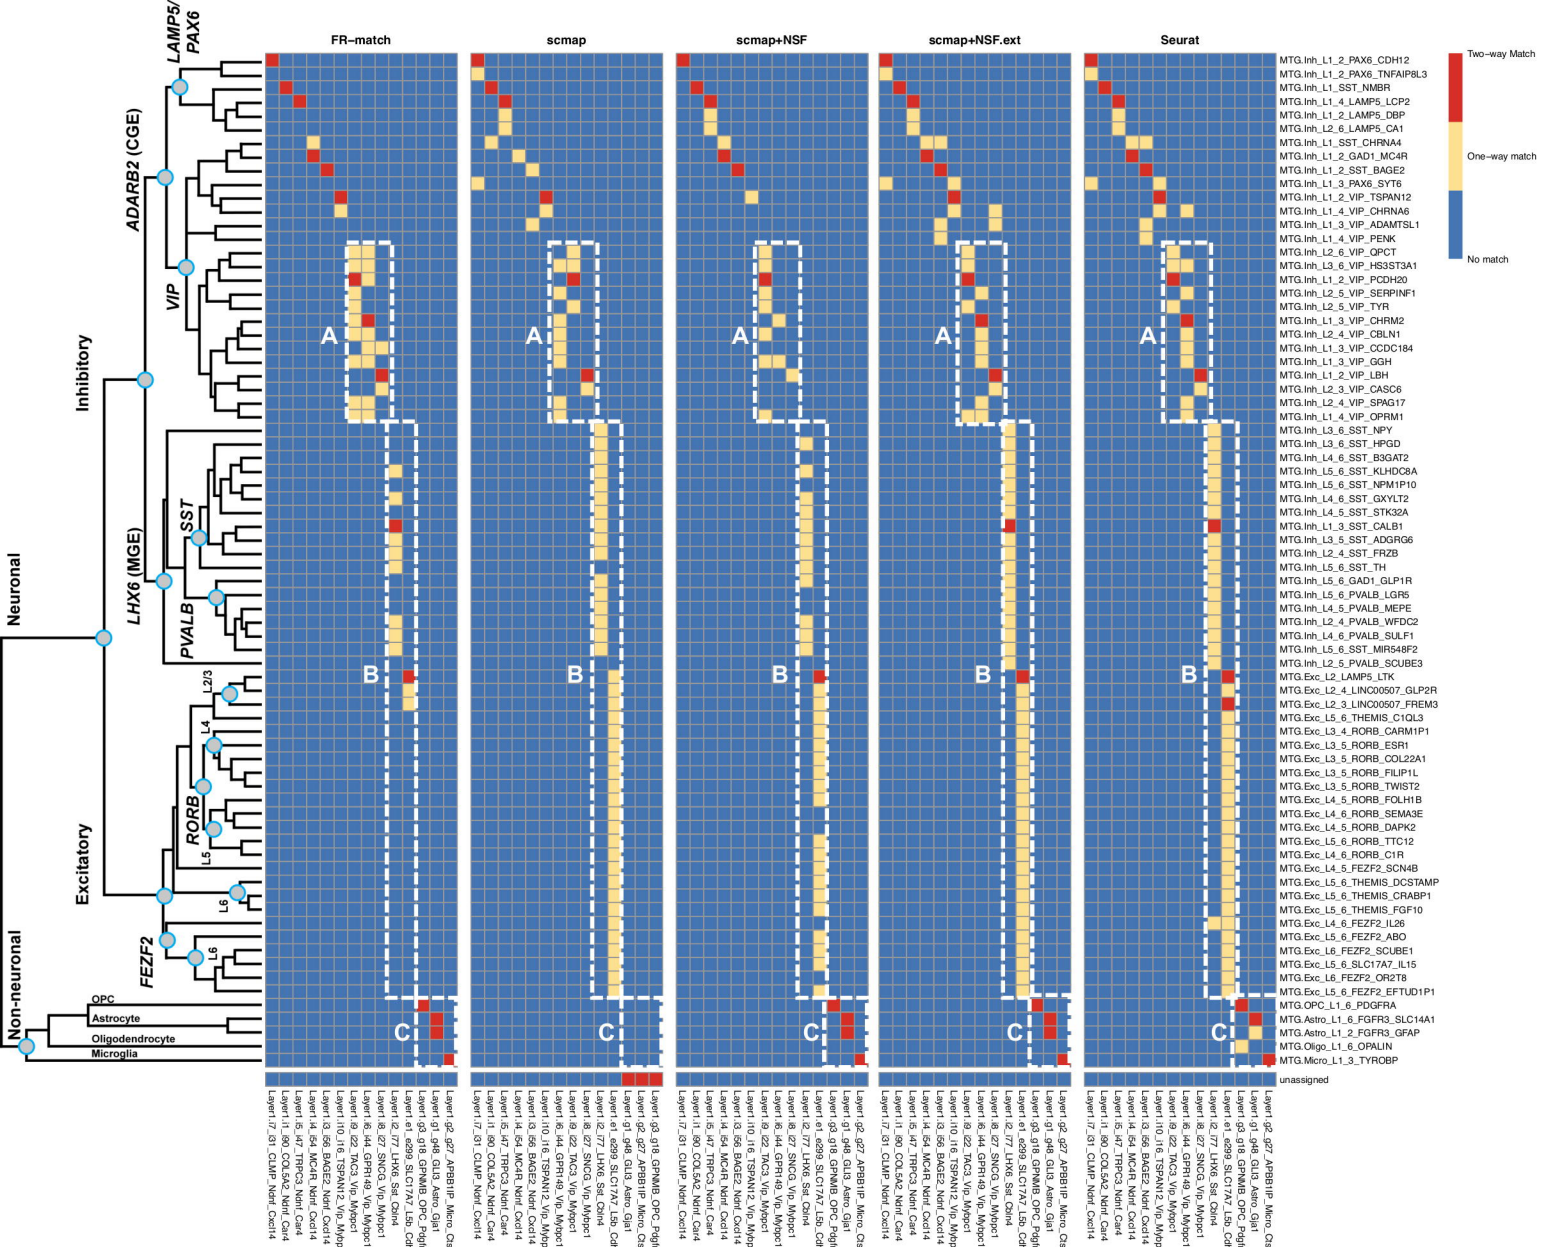

Source: https://www.biorxiv.org/content/10.1101/2020.05.01.073445v2.full.pdf
